# Supplementary material for: The ADAMTS131239–1253 peptide is a dominant HLA-DR1-restricted CD4+ T-cell epitope
Source: PubMed Central journal article supplement — Haematologica. 2017 Jul 27;102(11):1833–41. doi: 10.3324/haematol.2015.136671 (PMC5664387; doi:10.3324/haematol.2015.136671), 2017-11
Supplement: 2015_136671-Disclosures_and_Contributions.pdf [file 2015_136671-Disclosures_and_Contributions.pdf]

Haematologica  
HAEMATOL/2015/136671  
Version 4

The ADAMTS13<SUP>1239-1253</SUP> peptide is a dominant  
HLA-DR1-restricted CD4+ T-cell epitope

Laurent Gilardin, Sandrine Delignat, Ivan Peyron, Mathieu Ing,  
Yu-Chun Lone, Bagirath Gangadharan, Baptiste Michard, Yousra  
Kherabi, Meenu Sharma, Anastas Pashov, Jean-Baptiste Latouche,  
Mohamad Hamieh, Olivier Toutirais, Pascale Loiseau, Lionel Galicier,  
Agnès Veyradier, Srinikaveri, Bernard Maillère, Paul Coppo, and  
Sébastien Lacroix-Desmazes

Disclosures: none

Contributions: LG, PC, SK and SLD designed the research and wrote the paper. LG, SD, IP, MI, YL, BG, BM, YK, MS, AP, JBL, MH, OT, PL performed the research. PC and LGa provided patients' samples. AV performed the ADAMTS13 investigation for medical diagnosis in human samples and reviewed the manuscript. LG, BM, PC and SLD analysed the data.
